# Supplementary material for: Characterization of the role of spatial proximity of DNA double-strand breaks in the formation of CRISPR-Cas9-induced large structural variations
Source: HighWire-hosted journal article supplement (doi:10.1101/gr.278575.123), 2025-01-13
Supplement: Supplemental_fig_S7.pdf [file Supplemental_fig_S7.pdf]

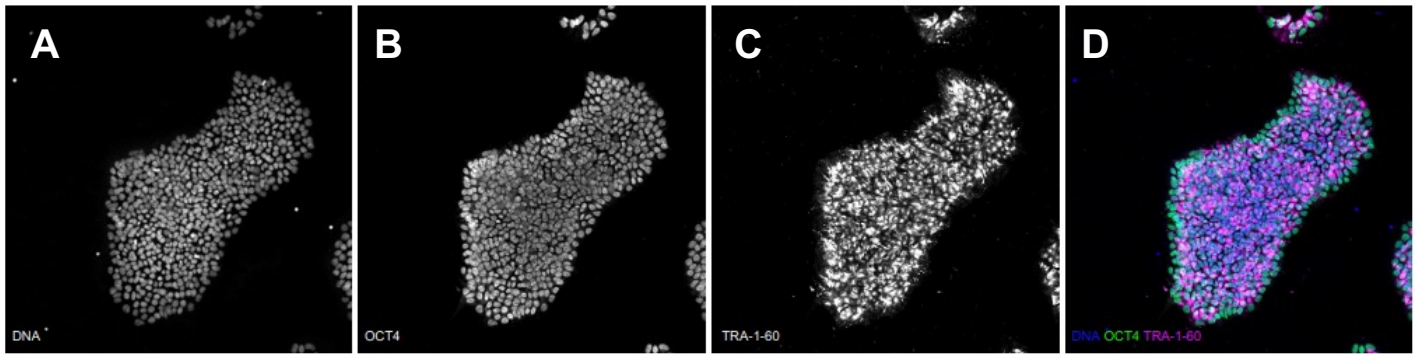

**Supplemental Fig S7.** Pluripotency markers in H9 hESC. Markers were visualized using standard immunofluorescence. **(A)** Hoechst 33342 nuclear staining for DNA. **(B)** OCT4. **(C)** TRA-1-60. **(D)** Merged image of Hoechst, OCT4 and TRA-1-60 with pseudo-colors.
