# Supplementary material for: Characterization of the role of spatial proximity of DNA double-strand breaks in the formation of CRISPR-Cas9-induced large structural variations
Source: HighWire-hosted journal article supplement (doi:10.1101/gr.278575.123), 2025-01-13
Supplement: Supplemental_fig_S9.pdf [file Supplemental_fig_S9.pdf]

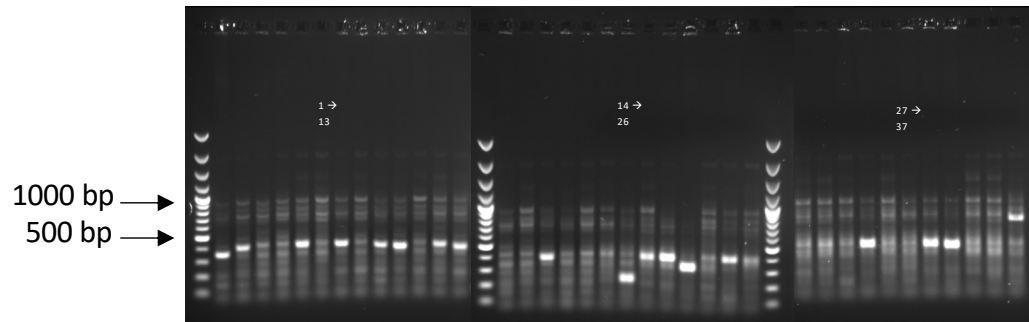

**Supplemental Fig S9.** Validation of ddPCR results with single cell clones. Single cell clones were generated of one of the edited cell populations and checked for the presence of deletions in individual cells to compare with ddPCR results. The cell population was randomly chosen, Chr17 AB, and had a measured ddPCR deletion frequency of 14.8 %. We found that 18 out of 37 clones (48.6 %) had the deletion. This corresponds to a deletion frequency of at least 16 %, since K562 is triploid on Chromosome 17. For an error-free junction ligation, the expected amplicon length is 406 bp.
