# Supplementary material for: Characterization of the role of spatial proximity of DNA double-strand breaks in the formation of CRISPR-Cas9-induced large structural variations
Source: HighWire-hosted journal article supplement (doi:10.1101/gr.278575.123), 2025-01-13
Supplement: Supplemental_fig_S11.pdf [file Supplemental_fig_S11.pdf]

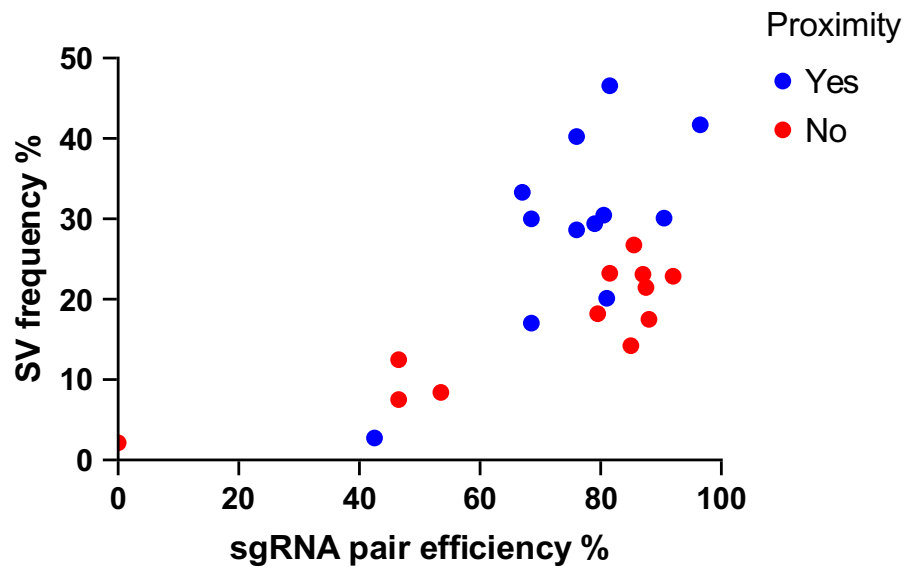

**Supplemental Fig S11.** Scatter plot of sgRNA pair efficiency and spatial proximity as variables for SV frequency in K562 cells.
