# Supplementary material for: Characterization of the role of spatial proximity of DNA double-strand breaks in the formation of CRISPR-Cas9-induced large structural variations
Source: HighWire-hosted journal article supplement (doi:10.1101/gr.278575.123), 2025-01-13
Supplement: Supplemental_fig_S12.pdf [file Supplemental_fig_S12.pdf]

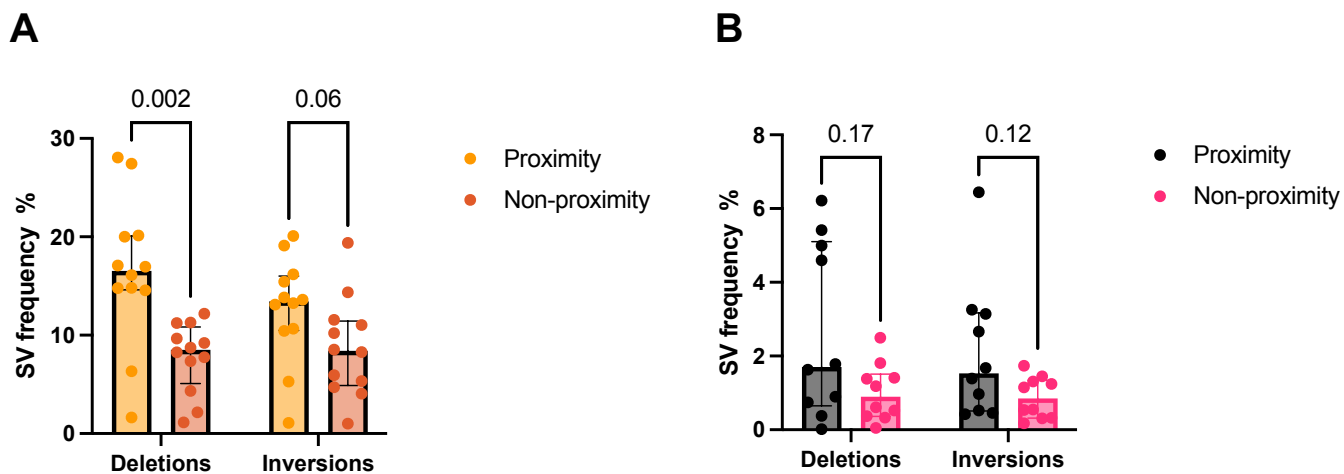

**Supplemental Fig S12.** Deletion vs. inversion frequencies. **(A)** K562 cells (Fig1G and FigS12A are based on the same data for deletions and inversions). **(B)** H9 hESc (Fig2C and FigS12B are based on the same data for deletions and inversions).
