# Supplementary material for: Characterization of the role of spatial proximity of DNA double-strand breaks in the formation of CRISPR-Cas9-induced large structural variations
Source: HighWire-hosted journal article supplement (doi:10.1101/gr.278575.123), 2025-01-13
Supplement: Supplemental_fig_S13.pdf [file Supplemental_fig_S13.pdf]

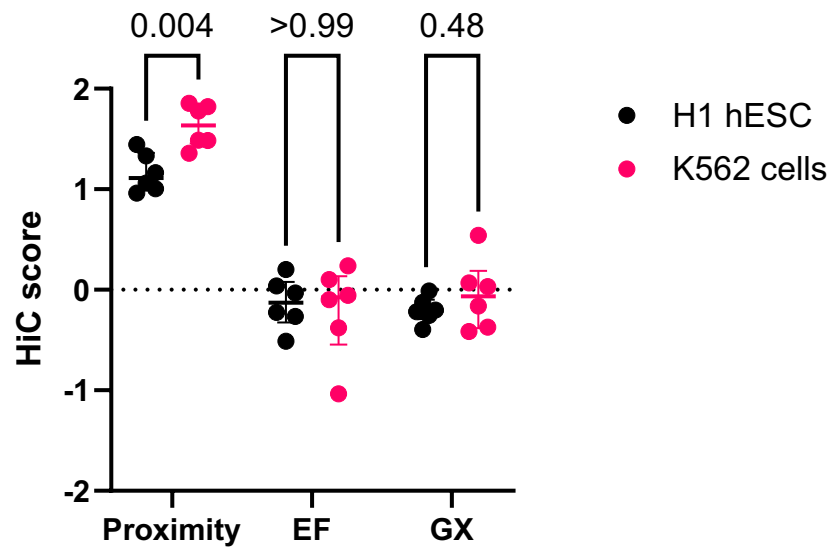

**Supplemental Fig S13.** Comparing HiC scores between H1 hESC and K562 cells at the different sgRNA targets in our experiment. The HiC score is the  $\log_{10}$  of the observed/expected interaction between two loci in a HiC heat map. The proximity loci are the AB and CD sgRNA pairs.
