# Supplementary material for: Characterization of the role of spatial proximity of DNA double-strand breaks in the formation of CRISPR-Cas9-induced large structural variations
Source: HighWire-hosted journal article supplement (doi:10.1101/gr.278575.123), 2025-01-13
Supplement: Supplemental_fig_S14.pdf [file Supplemental_fig_S14.pdf]

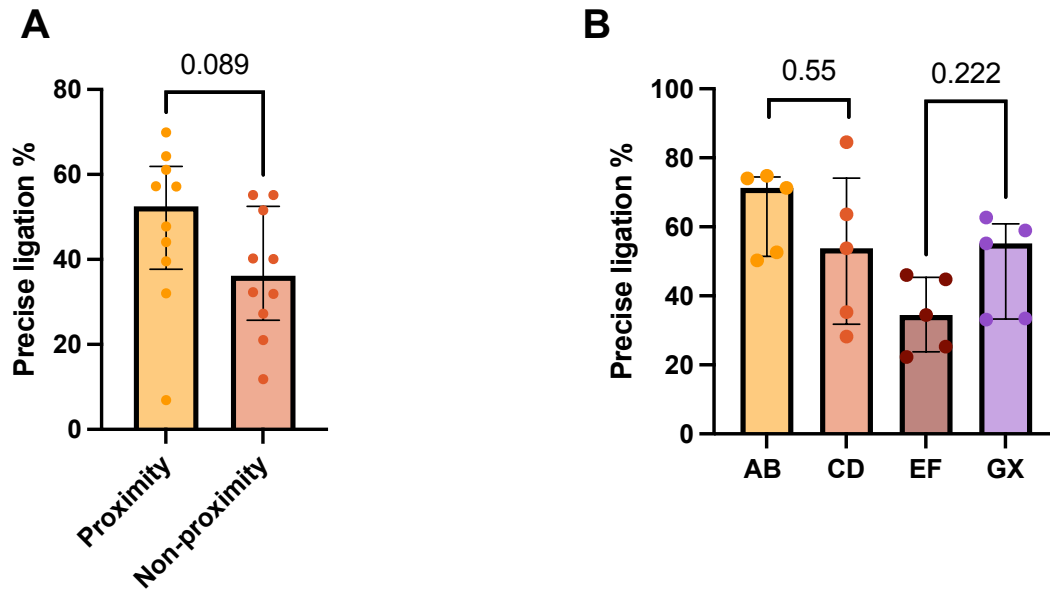

**Supplemental Fig S14. (A)** Comparing precise ligation at chimeric deletion junctions between the proximity and non-proximity sgRNA pairs if 1-2 bp resections are not included in the definition of precise repair. **(B)** Precise ligation including 1-2 bp indels for individual sgRNA pairs.
