# Supplementary material for: Characterization of the role of spatial proximity of DNA double-strand breaks in the formation of CRISPR-Cas9-induced large structural variations
Source: HighWire-hosted journal article supplement (doi:10.1101/gr.278575.123), 2025-01-13
Supplement: Supplemental_Tables.docx [file Supplemental_Tables.docx]

**Supplemental Table S1.** UCSC accession numbers for CTCF, RAD21 and SMC3 ChIP-seq tracks.

| **Transcription factor** | **UCSC accession numbers** | **Labs** |
| --- | --- | --- |
| CTCF | wgEncodeEH000042, wgEncodeEH002279, wgEncodeEH002797, wgEncodeEH000535, wgEncodeEH000399 | Bernstein - Broad Institute,  Myers - Hudson Alpha,  Snyder – Stanford,  Iyer - UT Austin,  Stamatoyannopoulous - UW |
| RAD21 | wgEncodeEH001585, wgEncodeEH000649 | Myers - Hudson Alpha,  Snyder – Yale |
| SMC3 | wgEncodeEH001845 | Snyder - Stanford |
| Conservation of CTCF, RAD21 and SMC3 | “Transcription Factor ChIP-seq Clusters (338 factors, 130 cell types) from ENCODE 3” | ENCODE 3 |

**Supplemental Table S2.** sgRNA sequences with predicted specificity and efficiency scores from CRISPOR.

| **Locus** | | **Protospacer sequence** | **PAM** | **Orientation** | **MIT Specificity Score** | **Predicted Efficiency Score** |
| --- | --- | --- | --- | --- | --- | --- |
| **Chr** | **Site** |
| 2 | A | UUAGUUGGUACAAGACGGCA | GGG | + | 93 | 67 |
| B* | CACCUCCCGUGUCACCCGGG | CGG | - | 84 | 71 |
| C | AAUACUACGAUCAACGCCCG | CGG | + | 100 | 71 |
| D | AGUAUCGUUAUUGAGGAGGG | AGG | - | 84 | 69 |
| E | UGGCAUGAAUGAGGUCGAGG | GGG | + | 79 | 71 |
| F | GAACCGACUCUGCCCCACAU | GGG | - | 83 | 64 |
| G | CCAGGGGGCCUUCUUUAGCG | AGG | - | 92 | 60 |
| 6 | A* | CCAUUCUCAAUAUAAAACUC | AGG | + | 72 | 53 |
| B | AGAGCCCGUGAUAUCGCCUG | AGG | - | 97 | 69 |
| C | GAUCAGGUACUUGUCAUUUG | AGG | + | 76 | 52 |
| D | UUAACUUUAACCUCUGACGC | CGG | - | 86 | 51 |
| E | UGUCUACACACGGAUGAUUG | GGG | + | 88 | 61 |
| F | CUGUGCUAAACCGCCCUCAA | AGG | - | 95 | 58 |
| G | GAAAACAAAUCUAUGCUAGU | GGG | + | 73 | 60 |
| 10 | A | GGCUCCAAGGCAACGUCUUG | AGG | + | 88 | 53 |
| B | GACUAUUUAACUACAUGCUG | TGG | - | 84 | 63 |
| C | AGUCUGUGUGUCGAAAGACU | AGG | + | 87 | 69 |
| D | UGGAGAGUUCUAAAGCCGGA | AGG | - | 85 | 64 |
| E | CCAUGUUGGAGGUCAAUCUG | GGG | + | 85 | 70 |
| F | UGUCGGGGCUUUGGCCCGAG | GGG | - | 89 | 63 |
| G | GGGCUCGUCUUAGUGCACCC | AGG | - | 91 | 67 |
| H* | CACCGUAGAGUUAUAGAAAC | TGG | - | 91 | 96 |
| 17 | A* | AGAAGAAUCCCACUCUCGAA | GGG | + | 87 | 62 |
| B | UGGCCUGUUCUCUGUCUCGG | TGG | - | 72 | 57 |
| C | AACACAUAAACCAUUCAACA | TGG | + | 61 | 69 |
| D | UCUUUUCAGUGAAGUAUACG | TGG | - | 83 | 69 |
| E | CUGUUUAGAGCCACGAAGCG | GGG | - | 95 | 58 |
| F | UCUGAUUCACGAUCAGAGCU | GGG | + | 79 | 60 |
| G | CAGUUUCCACCGUACACUGA | AGG | + | 87 | 75 |
| 21 | A | ACUAGCAGGGAUUUAAUCAG | AGG | + | 84 | 60 |
| B* | UGGCUACUGUAUGUAUACUU | CGG | - | 74 | 62 |
| C | CAUAGCGAGAGUCAAACUGG | GGG | + | 88 | 75 |
| D | GCUGAGCCCUCUAACUGACG | GGG | - | 94 | 72 |
| E | GUUAGGGAGAUAGGAAUACG | AGG | + | 86 | 68 |
| F | GAUGGUAUACAGUCCAACAC | TGG | - | 90 | 61 |
| G | UCUAGUCCCACUAGAUCCUG | TGG | - | 79 | 94 |
| X | A | CAGACCUGAUGGAACACAAU | CGG | + | 70 | 54 |
| B* | UACCAGUAGUAGAUCCUCUG | GGG | - | 83 | 72 |
| C | AACUCGACCUAUUCCAACCA | AGG | + | 90 | 62 |
| D | GUACAAAAUAUGUCCCGGCG | CGG | - | 81 | 75 |
| E | CAUGUGGGCAGCCCCCAUAA | GGG | + | 81 | 58 |
| F | AAGCCCCCAGGAAUAACAGU | GGG | - | 80 | 66 |
| G | UGACAAUACUCACCCUACCC | TGG | - | 75 | 63 |

*The 2nd guide in sgRNA pair GX.

**Supplemental Table S3.** ddPCR primers used in the experiment.

| **Locus** | | | **Forward primer** | | **Reverse primer** | |
| --- | --- | --- | --- | --- | --- | --- |
| **Chr** | **sgRNA pair** | **Edit type** | **Primer sequence** | **Nearest cut site** | **Primer sequence** | **Nearest cut site** |
| 2 | AB | Del | ATAGGAACGCTGGTGTGAAC | 18 bp | TTTCTAAGGTGTGCTCGGTG | 173 bp |
| AB | Inv | AGCACCTGCAATAGTTTCCT | 24 bp | TTTCTAAGGTGTGCTCGGTG | 173 bp |
| CD | Del | AAGCCAGGAAGAGCAATTAT | 26 bp | CATCTGTGTGATCCCCAATC | 179 bp |
| CD | Inv | AAAGGGTTTGTGCATGTTG | 24 bp | CATCTGTGTGATCCCCAATC | 179 bp |
| EF | Del | GGCTTTGAAGTGAGATGGGA | 106 bp | CCCTGCAAAGTTGTGGTAAC | 23 bp |
| EF | Inv | GGCTTTGAAGTGAGATGGGA | 106 bp | AAAGTCTCTGCCAGGGAGAT | 32 bp |
| GB | Del | TTTTGTGCCCCCTTTAAGGT | 55 bp | CCAACACGTTTTCACAGCTC | 55 bp |
| GB | Inv | CGGTTTCTGACTGTGGACTC | 85 bp | CCAACACGTTTTCACAGCTC | 55 bp |
| 6 | AB | Del | TTACTTTTCGGTGGCAGTCA | 17 bp | AGGACTCAGAGGGTGAAGAG | 50 bp |
| AB | Inv | GCCCAGCCAATACTTTCTTG | 24 bp | AGGACTCAGAGGGTGAAGAG | 50 bp |
| CD | Del | TGAACCAAATGCAATTTTCCCT | 65 bp | TGATGCCCTTCTCCTCACT | 137 bp |
| CD | Inv | CTGGTGGTTCTAAAAGGGCT | 57 bp | TGATGCCCTTCTCCTCACT | 137 bp |
| EF | Del | GAGACTCTGATGAAAAATGCT | 105 bp | GGGTAAATCCAATATCCAGC | 58 bp |
| EF | Inv | GGCAAGAGACTCTGATGAA | 105 bp | CTTCCCCTCACTGTTGAC | 16 bp |
| GA | Del | TTCTAGGACCCAACACATGA | 76 bp | CCCAGCCAATACTTTCTTGA | 23 bp |
| GA | Inv | TTCTAGGACCCAACACATGA | 76 bp | TTTTACTTTTCGGTGGCAGT | 19 bp |
| 10 | AB | Del | CAGGTCCAGATGCTCCATTC | 72 bp | GGTAGTTCACTCACCAAATCAAG | 132 bp |
| AB | Inv | CAGGTCCAGATGCTCCATTC | 72 bp | ACCAAAACAGAGAAGAAATGGG | 70 bp |
| CD | Del | CCCTGATGAGTGATGTTGG | 112 bp | AGGTCACTGGCACAATC | 24 bp |
| CD | Inv | CCCTGATGAGTGATGTTGG | 112 bp | GTCATTTACTGGTCAGGGAT | 36 bp |
| EF | Del | TCAGCTAGTTGTCAGTTAGCA | 45 bp | GCAACAGCCAATGAGAGTGA | 108 bp |
| EF | Inv | TGGTGGGTGAAACTTCTCTG | 18 bp | GCAACAGCCAATGAGAGTGA | 108 bp |
| GH | Del | AGCCCCGCTAGGTTTTATTC | 40 bp | CTCCTTGAAACCCCCACAAT | 59 bp |
| GH | Inv | GACTCCACCTAGCAAGCATT | 59 bp | CTCCTTGAAACCCCCACAAT | 59 bp |
| 17 | AB | Del | CTAGTGGCTTTGAGTGAGGG | 87 bp | TGGCCATTGCAAAACCTGAC | 36 bp |
| AB | Inv | CTAGTGGCTTTGAGTGAGGG | 87 bp | CCCGTGAAATGCAAGTAAGC | 88 bp |
| CD | Del | CAGCTGGGATGTCTGCAG | 85 bp | TCTGTGAAAAATGTTTTGAAGCT | 46 bp |
| CD | Inv | TGGAACTTCATTCAAAGGTAAGG | 85 bp | CCTATCCCAGAACCTCACTG | 28 bp |
| EF | Del | AATCTGGGAGACACAGTTGG | 83 bp | TGCAAAATCCTAGCTGTGGT | 75 bp |
| EF | Inv | CTGGGAGACACAGTTGG | 83 bp | GACCATCCTGACATTACCCG | 60 bp |
| GA | Del | TCTTGTACCCCTTTCCCTGA | 64 bp | CAGTCCTAGGAGTCAGAGCT | 16 bp |
| GA | Inv | TCTTGTACCCCTTTCCCTGA | 64 bp | GAAAGAAAACCCCCTCCCTC | 34 bp |
| 21 | AB | Del | TTGAGATAGGAGCTGGTCAC | 31 bp | AGCTCTTAGAGATCTAACACAAA | 125 bp |
| AB | Inv | CAAAAATCACTTTCAAAGGACA | 17 bp | AGCTCTTAGAGATCTAACACAAA | 125 bp |
| CD | Del | CCAGATCGACTCCCTTTGTG | 69 bp | TTGGTTCCGAGGACTTCTTG | 52 bp |
| CD | Inv | CTTTACTGGAAACAACATCATTCC | 98 bp | TTGGTTCCGAGGACTTCTTG | 52 bp |
| EF | Del | TAGTGGTCATGTGCCTAAGT | 27 bp | TGTTTAGATCGAGCATGGTG | 112 bp |
| EF | Inv | AAACTTTTTATAAACACCTTCTTGAAA | 78 bp | TGTTTAGATCGAGCATGGTG | 112 bp |
| GB | Del | TCAACACCCATTTTCCCAAG | 12 bp | AAACCTGGCTTTAGTCCAAC | 165 bp |
| GB | Inv | TGCACTTTTTCCATAAATGAGG | 37 bp | AAACCTGGCTTTAGTCCAAC | 165 bp |
| X | AB | Del | AACTTACAGGTACCTACGGC | 88 bp | TGTTTGCACATTATTCCTACCAG | 11 bp |
| AB | Inv | AACTTACAGGTACCTACGGC | 88 bp | ACTGTAGTAGAGGTTGAGGAG | 33 bp |
| CD | Del | ACCAAACCAACCCAAACCTA | 21 bp | ACGTTTGTAATCGCAGCA | 108 bp |
| CD | Inv | CGTAGGTACCTGTAAGTTATTTTAC | 86 bp | ACGTTTGTAATCGCAGCA | 108 bp |
| EF | Del | GCGTACACCTCCAGTAAACA | 59 bp | GCCTACACCTTCAAGACACA | 99 bp |
| EF | Inv | GCGTACACCTCCAGTAAACA | 59 bp | TTGGGGCTTTCCTTTATGCT | 48 bp |
| GB | Del | TCCAGCCTCACGTTTTTAAT | 79 bp | AAGAGCTCTGAGAAAAAGCC | 73 bp |
| GB | Inv | TTGCATTTTAATGACTTGTTTGC | 27 bp | AAGAGCTCTGAGAAAAAGCC | 73 bp |

**Supplemental Table S4.** FAM and HEX probes used for ddPCR.

| **Locus** | | **FAM** | | **HEX** | |
| --- | --- | --- | --- | --- | --- |
| **Chr** | **sgRNA pair** | **Probe sequence** | **Nearest cut site** | **BioRad assay ID** | **Locus** |
| 2 | AB | CCACAGCCCCAGGAGCAGCCACC | 13 bp | dHsaCP2506407 | *ROCK2* |
| CD | TGACACTCCTGCTTCCTTTTCCCGTAGTGG | 146 bp |
| EF | CCAGCTTGCTTTCTGTGCTCCGTGCC | 43 bp |
| GB | ACGGAGTCCCCATCACTGGGCTGACT | 22 bp |
| 6 | AB | TCGCGCTTCCTCTGTTCAGCTCCCAC | 24 bp | dHsaCP2506494 | *BAG2* |
| CD | TCCCACCCTGCCGCCTCTCAGC | 110 bp |
| EF | TCACAAACTCCTCTTTCAGCTGCTAGCA | 39 bp |
| GA | AGCACCTCACAGCATTCAGGAACACAGT | 33 bp |
| 10 | AB | CGGCGCTGCAGAGTTCTGCCTAGC | 48 bp | dHsaCP2506962 | *ANK3* |
| CD | TGTACATTTGGTGAGGTCTTGGTTCCCTGA | 49 bp |
| EF | ACAGCCCCAGGGAATGCAGCCCA | 19 bp |
| GH | TGTCCGCAGTGTCCCAGGCCGA | 33 bp |
| 17 | AB | CCTCTCCTGCCGACTGCGGCCA | 16 bp | dHsaCP2506954 | *ACE* |
| CD | CCCACCCTACCTCTGCTTTTCCGGGG | 42 bp |
| EF | CCACGTCCTGTCACCATGGCTAGCTGAA | 53 bp |
| GA | ACGCACAGGTCTCTGGGCTCTGCC | 21 bp |
| 21 | AB | TCACTGTGCTTCCCACTCGCAGCAGT | 98 bp | dHsaCP2507167 | *RUNX1* |
| CD | ACCTCTCCTGCCTGTACCCCTCTCCACA | 21 bp |
| EF | TGTCCACATCACAGAAAATCGTCCTCTGCC | 75 bp |
| GB | CCCGCTGGCCACAACATCCTTAGGC | 138 bp |
| X | AB | TCCCACAGCGCCATCTGCTGGCT | 61 bp | dHsaCP2506461 | *IL1RAPL1* |
| CD | CCGCCTACCTTGGCCCCCGC | 84 bp |
| EF | TTGCTGGCAGGCCACCGCGC | 16 bp |
| GB | ACTTGGCTACCTTTCCCCCAGTTGTTTGTC | 32 bp |

**Supplemental Table S5.** ICE primers used to assess individual guide efficiency.

| **Locus** | | **Forward primer** | | **Reverse primer** | |
| --- | --- | --- | --- | --- | --- |
| **Chr** | **sgRNA** | **Primer sequence** | **Nearest cut site** | **Primer sequence** | **Nearest cut site** |
| 2 | A | GGGAGAATGCACAGCTGGTT | 378 bp | GGGGCCAAAGAACTCTGAGG | 213 bp |
| B | GCACAGATGGTCATGGCTGA | 426 bp | GGTGTGCTCGGTGATGAGTT | 166 bp |
| C | GGGAGAAAGCACCGTGTCTT | 378 bp | CCGAAACCGACCCTCACAAA | 219 bp |
| D | AACTCATCACCGAGCACACC | 339 bp | CACAGGTGATCCGCTTCACA | 282 bp |
| E | GGCCTCTAGTGCTACCCAGA | 302 bp | GTGAGGCCGTGCACATTTTC | 393 bp |
| F | TGGAGAGAAGCCTTGGGTCT | 264 bp | TGAGGCGTAGAGTGTGGCTA | 128 bp |
| G | CAGTCCCAGTGCATCCTGTG | 354 bp | GGGTATTCGTGATGACCGGG | 149 bp |
| 6 | A | GGCCTTGGTCTCTGGCTTTT | 173 bp | AGAGCGGTGGCATGATCTTG | 265 bp |
| B | CCACCACCTGCAAACTTCCT | 397 bp | ATGCCCTTCTCCTCACTCGT | 277 bp |
| C | CCGCCCTTCCTCTTGAACTC | 465 bp | AGTCCTTTAATGCTGCGCAGT | 151 bp |
| D | TGGGGCCTTTACGCTAGACT | 168 bp | GCCCCCATTGCCTTTGAAGA | 322 bp |
| E | GGGATACCGGACCCCCATT | 209 bp | CGAGCTGCCTGTCTTTGGTT | 444 bp |
| F | TTAGTGATGCCCAAGCCCAC | 430 bp | CTATGCAAGAGGGCTGCCAA | 273 bp |
| G | TGGCATGATCACGTGACACA | 430 bp | TCCAATCAGCATCCCACAGTG | 197 bp |
| 10 | A | TGGTGAGGTCTTGGTTCCCT | 406 bp | TTTCCTCCGTGTGGCAGAAC | 305 bp |
| B | CAACTGCCAGTCTCCTGCTC | 326 bp | TAGAGGTCACTGCTGCTCCA | 185 bp |
| C | GGTTTCCGTAATGGCTGTGC | 268 bp | GGTCCCTCGGAAACAAGGTC | 206 bp |
| D | GCAGTGACCTCTAGTGTCTGG | 477 bp | AGCATCCTAAAACCTCTTGCCA | 210 bp |
| E | AAGCCCTAAAGAGCACGTCG | 195 bp | AGTCTCACCCTCTGTCACCC | 318 bp |
| F | GGGGAGCAGTCTATGGGGAT | 151 bp | GAGTCATTGGAGGGCAGTGG | 212 bp |
| G | AGGCTCTGCATGGTTCTGTG | 241 bp | TAGCCAGCAACCAGACATGC | 249 bp |
| H | AAGGCCACCATCTAGTGACAA | 309 bp | AAAGGTTTCTCCTCCCCCACAA | 182 bp |
| 17 | A | GAGAGGGGCTTGAAGAACGG | 309 bp | ATGAATGAGGGACCAGGCAC | 336 bp |
| B | GCCGAGGCATATGGATCACA | 503 bp | TGTCCAATACAGTCGCCACC | 197 bp |
| C | CTGTGTTGGCTGCTCAGAAC | 380 bp | TGAGCCAGTCACTTTCCACC | 150 bp |
| D | AGCAATCTGGTGTAGGCTCC | 254 bp | CGTGCTCGGCTGGTAACTAA | 159 bp |
| E | GCAACAGACAGAGACTCCGT | 343 bp | ACCCAAATTTCAGTCGAGGC | 251 bp |
| F | TCCTGGTCTTAACAGAGGTTCC | 174 bp | CAGTTTGGTGGAGGGGATTGG | 314 bp |
| G | CAAGACCAACCAGCCTGAGC | 318 bp | CGCCTTGCCCCTTTATGGTT | 437 bp |
| 21 | A | TGCTGGAATTGGAAGTGGACA | 154 bp | CAGTGTTTCCAGCAGCAAGC | 269 bp |
| B | TGTGAGGCTTGAGCTGGGTA | 362 bp | TGCTTACACCACAAGCTTCCA | 155 bp |
| C | GGGAAGCTGTTTGGTATTAGTCCT | 308 bp | ACCATCGCCACCTTGTGTTT | 207 bp |
| D | TCCAATGACTGCTGCGAGTG | 315 bp | CTCAGGCAACGTGAGAGCAT | 172 bp |
| E | CAGAGAGAAGTGGGGACGGA | 183 bp | ATTTGCCAGAAGTGTGGGGT | 256 bp |
| F | CCGAGTAGCTAGGACTGCAT | 320 bp | GCATGATCCCCTTAGAGTCTGG | 203 bp |
| G | CAGGAGCCTGAGAAAGCGTT | 411 bp | GTCCAACCAGCCTAAGGATGT | 151 bp |
| X | A | CGGTGACCCTTGGATCAGTG | 421 bp | GGCCTCAAGTGATCTGAAGGG | 207 bp |
| B | CGTCCAACTGTCTCAGCCTC | 268 bp | CCACAGGTGGTGCTGTAACA | 214 bp |
| C | CGGTGACCCTTGGATCAGTG | 219 bp | AGCAGCCGATTGTGTTCCAT | 192 bp |
| D | CAGGTTCTCACTGTCGCCTG | 407 bp | CAAATTCCATCAGGGGGCGA | 297 bp |
| E | TCAGGTCATGGTCAGTCGGT | 309 bp | TGTGTGCCCGTAATCTCAGC | 289 bp |
| F | TGGCACCTGTCACAGAAAGG | 381 bp | CCCTTCCCCACTCCATCTCA | 232 bp |
| G | TAGACACCACCCTGGCAAGA | 231 bp | CCTGCAGACCTCGAGACTCA | 202 bp |

**Supplemental Table S6.** High-throughput sequencing primers.

| **Locus** | | **Forward primer**  Linker:5’-ACACTCTTTCCCTACACGACGCTCTTCCGATCT – primer sequence–3’ | | **Reverse primer**  Linker: 5’- GACTGGAGTTCAGACGTGTGCTCTTCCGATCT-primer sequence-3’ | |
| --- | --- | --- | --- | --- | --- |
| **Chr** | **sgRNA pair** | **Primer sequence** | **Nearest cut site** | **Primer sequence** | **Nearest cut site** |
| 2 | AB* | TTCCCCTCTCACCTGGTCAG | 283 bp | GGTGTGCTCGGTGATGAGTT | 166 bp |
| 2 | CD | CCCGAGGGTTCAAAGGTCAC | 194 bp | CACAGGTGATCCGCTTCACA | 283 bp |
| 2 | EF | GGCCTCTAGTGCTACCCAGA | 302 bp | TGAGGCGTAGAGTGTGGCTA | 128 bp |
| 2 | GB | TGTAGGGACAGGGGAACAGG | 230 bp | TGGGGATGCACAAAGTGACC | 175 bp |
| 6 | AB | GGCCTTGGTCTCTGGCTTTT | 173 bp | ATGCCCTTCTCCTCACTCGT | 134 bp |
| 6 | CD | TAAAGTGGCCTGGCTGTTCC | 300 bp | ATGCCCTTCTCCTCACTCGT | 134 bp |
| 6 | EF | AGACACAAGACGGCTCATGG | 227 bp | GCAAGAGGGCTGCCAAAAAC | 269 bp |
| 6 | GA* | ACGAGGTTTTCAGTTTCAGACCT | 154 bp | AGAGCGGTGGCATGATCTTG | 265 bp |
| 10 | AB | CCGTCCTTCCAGAGCCTCTA | 295 bp | TAGAGGTCACTGCTGCTCCA | 185 bp |
| 10 | CD* | CACCAGCAGTGTGTAAGGGT | 235 bp | AGCATCCTAAAACCTCTTGCCA | 210 bp |
| 10 | EF* | AAGCCCTAAAGAGCACGTCG | 195 bp | GAGTCATTGGAGGGCAGTGG | 212 bp |
| 10 | GH | TCTGGCCACAATGCTTTCAGA | 184 bp | CAACCCTGTCAGCCGAGAAG | 175 bp |
| 17 | AB | GAGAGGGGCTTGAAGAACGG | 309 bp | CGCCACCAGTAAACGTGACT | 184 bp |
| 17 | CD | AAGGTTCCTTCCCTCCTTGG | 116 bp | CGTGCTCGGCTGGTAACTAA | 159 bp |
| 17 | EF | ATCTGGGAGACACAGTTGGG | 82 bp | ACTGAAGAGGGGTGGTCTGT | 189 bp |
| 17 | GA | CAAGACCAACCAGCCTGAGC | 318 bp | AGTGGGAGGATCACCAGGAG | 139 bp |
| 21 | AB | CGGCACTTGAGACCATGGAA | 119 bp | ACTGCATACTGACCACGAGA | 197 bp |
| 21 | CD | ACCGGGAAATGCTTTTTATTCACA | 365 bp | TGAGGTGAGATAGAGGGCAGG | 112 bp |
| 21 | EF | GAGAAGTGGGGACGGATCTT | 179 bp | CTGCATGATCCCCTTAGAGTCTG | 204 bp |
| 21 | GB | TGGTCTTGCAGTTCTAGCTGA | 123 bp | GTCCAACCAGCCTAAGGATGT | 151 bp |
| X | AB | AACCAAACCAACCCAAACCT | 224 bp | CCACAGGTGGTGCTGTAACA | 214 bp |
| X | CD | GGCGATGCCTTCTTGGAAGA | 123 bp | ACCTGGTGGCACTCTAACCT | 352 bp |
| X | EF | TCAGGTCATGGTCAGTCGGT | 309 bp | GGAGCTGTATCCCTAGGGCA | 132 bp |
| X | GB | CCCGTCCAACTGTCTCAGC | 271 bp | GCCTCCAAACTAGAACTGCCA | 108 bp |

*No results available for these sgRNA pairs due to primer failure

**Supplemental Table S7.** sgRNA pair efficiencies in K562 cells.

| **Locus** | | **ddPCR** | | | **ICE score** | | |
| --- | --- | --- | --- | --- | --- | --- | --- |
| **Chr** | **sgRNA pair** | **Deletion frequency** | **Inversion frequency** | **SV frequency (del + inv)** | **sgRNA 1** | **sgRNA 2** | **Pair mean** |
| 2 | AB | 20.02% | 10.43% | 30.45% | 75% | 86% | 80.50% |
| CD | 28.07% | 13.62% | 41.69% | 96% | 97% | 96.50% |
| EF | 9.20% | 8.29% | 17.49% | 80% | 96% | 88.00% |
| GX | 11.24% | 10.21% | 21.45% | 89% | 86% | 87.50% |
| 6 | AB | 16.12% | 13.27% | 29.39% | 93% | 65% | 79.00% |
| CD | 6.35% | 10.67% | 17.02% | 92% | 45% | 68.50% |
| EF | 7.75% | 4.72% | 12.47% | 53% | 40% | 46.50% |
| GX | 2.17% | 5.34% | 7.51% | 0% | 93% | 46.50% |
| 10 | AB | 16.96% | 13.12% | 30.08% | 98% | 83% | 90.50% |
| CD | 1.650% | 1.080% | 2.73% | 85% | 0% | 42.50% |
| EF | 1.135% | 0.998% | 2.13% | 0% | 0% | 0.00% |
| GX | 9.66% | 8.53% | 18.19% | 86% | 73% | 79.50% |
| 17 | AB | 14.79% | 13.83% | 28.62% | 81% | 71% | 76.00% |
| CD | 14.82% | 5.29% | 20.11% | 83% | 79% | 81.00% |
| EF | 8.27% | 5.94% | 14.21% | 89% | 81% | 85.00% |
| GX | 12.19% | 11.03% | 23.22% | 82% | 81% | 81.50% |
| 21 | AB | 14.56% | 15.43% | 29.99% | 54% | 83% | 68.50% |
| CD | 27.44% | 19.11% | 46.55% | 69% | 94% | 81.50% |
| EF | 4.33% | 4.07% | 8.40% | 18% | 89% | 53.50% |
| GX | 8.74% | 14.35% | 23.09% | 91% | 83% | 87.00% |
| X | AB | 20.13% | 20.10% | 40.23% | 62% | 90% | 76.00% |
| CD | 17.09% | 16.20% | 33.29% | 96% | 38% | 67.00% |
| EF | 7.37% | 19.37% | 26.74% | 95% | 76% | 85.50% |
| GX | 11.29% | 11.56% | 22.85% | 94% | 90% | 92.00% |

**Supplemental Table S8.** sgRNA pair efficiencies in H9 hESC.

| **Locus** | | **ddPCR** | | | **ICE score** | | |
| --- | --- | --- | --- | --- | --- | --- | --- |
| **Chr** | **sgRNA pair** | **Deletion frequency** | **Inversion frequency** | **SV frequency (del + inv)** | **sgRNA 1** | **sgRNA 2** | **Pair mean** |
| 2 | AB | 1.63 % | 1.39 % | 3.02 % | 0.00 % | 0.00 % | 0.00 % |
| CD | 4.60 % | 2.66 % | 7.26 % | 0.00 % | 0.00 % | 0.00 % |
| EF | 1.38 % | 1.15 % | 2.53 % | 0.00 % | 0.00 % | 0.00 % |
| GX | 1.81 % | 1.74 % | 3.54 % | 18.00 % | 0.00 % | 9.00 % |
| 6 | AB | 1.78 % | 1.68 % | 3.46 % | 0.00 % | 0.00 % | 0.00 % |
| CD | 0.37 % | 0.43 % | 0.80 % | 0.00 % | 0.00 % | 0.00 % |
| EF | 0.05 % | 0.32 % | 0.37 % | 0.00 % | 0.00 % | 0.00 % |
| GX | 0.37 % | 0.12 % | 0.50 % | 0.00 % | 0.00 % | 0.00 % |
| 17 | AB | 0.89 % | 0.97 % | 1.87 % | 0.00 % | 0.00 % | 0.00 % |
| CD | 0.02 % | 0.46 % | 0.48 % | 0.00 % | 0.00 % | 0.00 % |
| EF | 0.33 % | 0.17 % | 0.50 % | 0.00 % | 0.00 % | 0.00 % |
| GX | 0.61 % | 0.54 % | 1.15 % | 0.00 % | 0.00 % | 0.00 % |
| 21 | AB | 0.74 % | 0.53 % | 1.27 % | 0.00 % | 0.00 % | 0.00 % |
| CD | 5.00 % | 3.14 % | 8.14 % | 0.00 % | 0.00 % | 0.00 % |
| EF | 0.52 % | 0.55 % | 1.07 % | 0.00 % | 0.00 % | 0.00 % |
| GX | 1.41 % | 1.24 % | 2.65 % | 0.00 % | 0.00 % | 0.00 % |
| X | AB | 6.21 % | 6.44 % | 12.66 % | 0.00 % | 8.00 % | 4.00 % |
| CD | 5.41 % | 3.26 % | 8.67 % | 0.00 % | 0.00 % | 0.00 % |
| EF | 1.18 % | 1.31 % | 2.49 % | 0.00 % | 0.00 % | 0.00 % |
| GX | 2.50 % | 1.45 % | 3.94 % | 16.00 % | 8.00 % | 12.00 % |
